# Supplementary material for: 6-Aminocoumarin-derived Schiff base gelators: aggregation and sensing of CN − , Fe 3+ , Cu 2+ and CO 2 under different conditions
Source: Royal Society of Chemistry journal article supplement (doi:10.1039/d4ra05503a), 2024-01-01

## Supporting Information

### 6-Aminocoumarin derived Schiff base gelators: Aggregation and sensing of CN<sup>-</sup>, Fe<sup>3+</sup>, Cu<sup>2+</sup> and CO<sub>2</sub> under different conditions

Eshani Paul, Rameez Raza, Subrata Ranjan Dhara, Nabajyoti Baildy and Kumares Ghosh\*

*Department of Chemistry, University of Kalyani, Kalyani-741235, India.  
Email: [ghosh\\_k2003@yahoo.co.in](mailto:ghosh_k2003@yahoo.co.in); [kumareschem18@klyuniv.ac.in](mailto:kumareschem18@klyuniv.ac.in)*

**TableS1.** Results of gelation test for compounds **1** and compound **2**.

| Solvents                                                                                    | Compound 1                                     | Compound 2                                    |
|---------------------------------------------------------------------------------------------|------------------------------------------------|-----------------------------------------------|
| CHCl <sub>3</sub>                                                                           | S                                              | PS                                            |
| MeOH                                                                                        | I                                              | I                                             |
| THF                                                                                         | S                                              | PS                                            |
| DMF                                                                                         | S                                              | S                                             |
| DMSO                                                                                        | S                                              | S                                             |
| CH <sub>3</sub> CN                                                                          | S                                              | S                                             |
| 1,4-Dioxane                                                                                 | S                                              | S                                             |
| Toluene                                                                                     | I                                              | PS                                            |
| DMF-H <sub>2</sub> O (2:1,v/v)                                                              | <b>G (5 mg/mL) (T<sub>g</sub> = 75 °C)</b>     | <b>G (6 mg/mL)(T<sub>g</sub> = 78 °C)</b>     |
| DMSO-H <sub>2</sub> O (2:1,v/v)                                                             | <b>G (4 mg/mL) (T<sub>g</sub> = &gt;80 °C)</b> | <b>G (5 mg/mL)(T<sub>g</sub> = &gt;80 °C)</b> |
| Dioxane-H <sub>2</sub> O (2:1,v/v)                                                          | <b>G (5 mg/mL) (T<sub>g</sub> = 68 °C)</b>     | <b>G (6 mg/mL) (T<sub>g</sub> = 70 °C)</b>    |
| S = Soluble; G = Gel (minimum gelation concentration); PS= Partially soluble; I= Insoluble. |                                                |                                               |

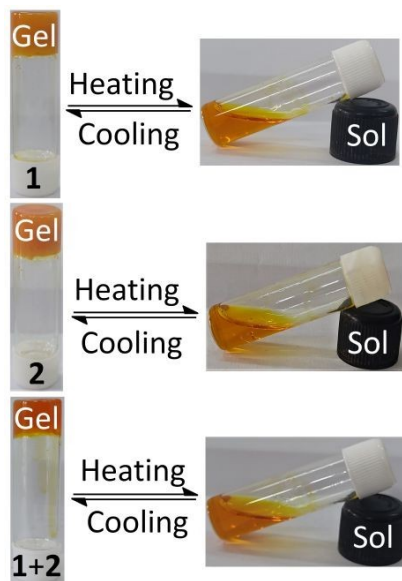

**Figure S1.** Thermo-reversibility of gel **1** ( $c = 1.35 \times 10^{-2} \text{M}$ ), gel **2** ( $c = 1.2 \times 10^{-2} \text{M}$ ) and mixed gel of **1** and **2** in DMF- $\text{H}_2\text{O}$  (2: 1, v/v).

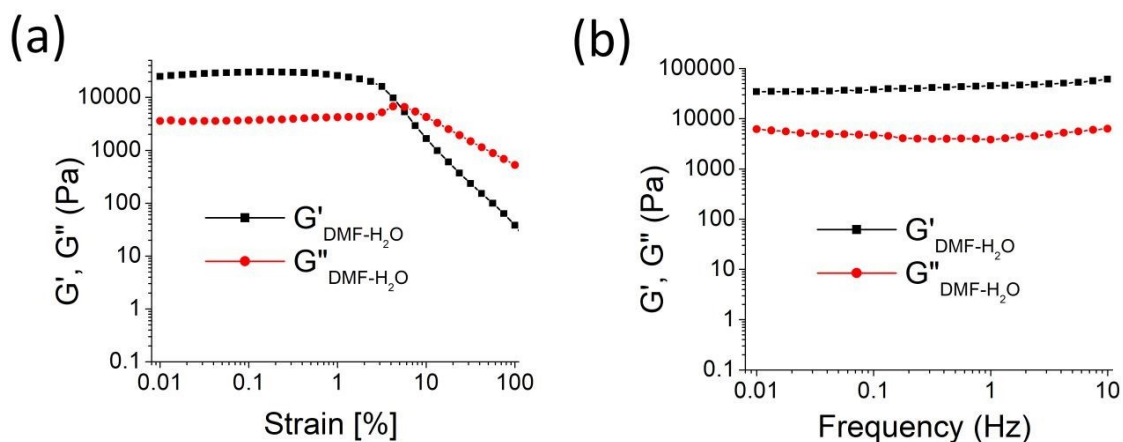

**Figure S2.** Rheology study of the mixed gel of **1** and **2** in DMF- $\text{H}_2\text{O}$  (2: 1, v/v): (a) amplitude sweep (at constant frequency of 1 Hz) and (b) frequency sweep (at constant 0.01% strain) experiments.

**Table S2.** Summary of rheological properties of mixed gel of **1** and **2**.

| Gel in Solvent                         | Critical strain (%) | Crossover (% strain) | $G'_{av}(\text{Pa})^*$ | $G''_{av}(\text{Pa})^*$ | $G''_{av}/G'_{av}$ |
|----------------------------------------|---------------------|----------------------|------------------------|-------------------------|--------------------|
| Mixed gel in DMF- $\text{H}_2\text{O}$ | 1.01                | 5.10                 | 41852                  | 6212.8                  | 0.148              |

\* $G'_{av}$  and  $nG''_{av}$  values were calculated from frequency sweep data.

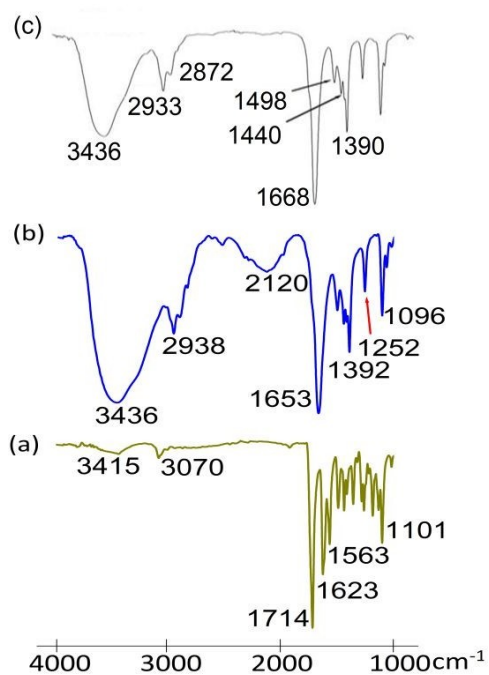

**Figure S3.** Comparison of FT-IR spectra of **1** in the (a) powder and (b) gel state in DMF-H<sub>2</sub>O (2:1, v/v). In the series (c) indicates the FT-IR of DMF solvent.

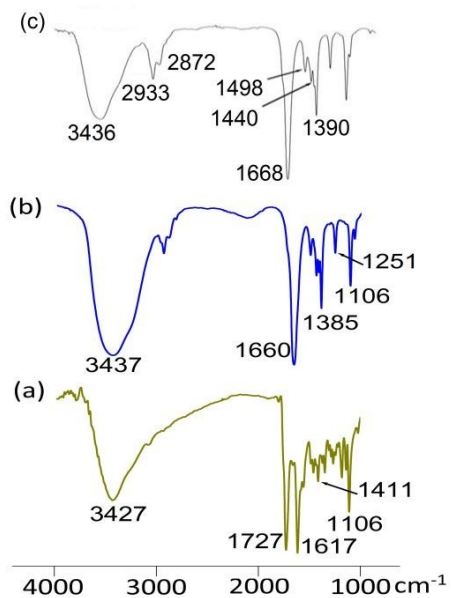

**Figure S4.** Comparison of FT-IR spectra of **2** in the (a) powder and (b) gel state in DMF-H<sub>2</sub>O (2:1, v/v). In the series (c) indicates the FT-IR of DMF solvent.

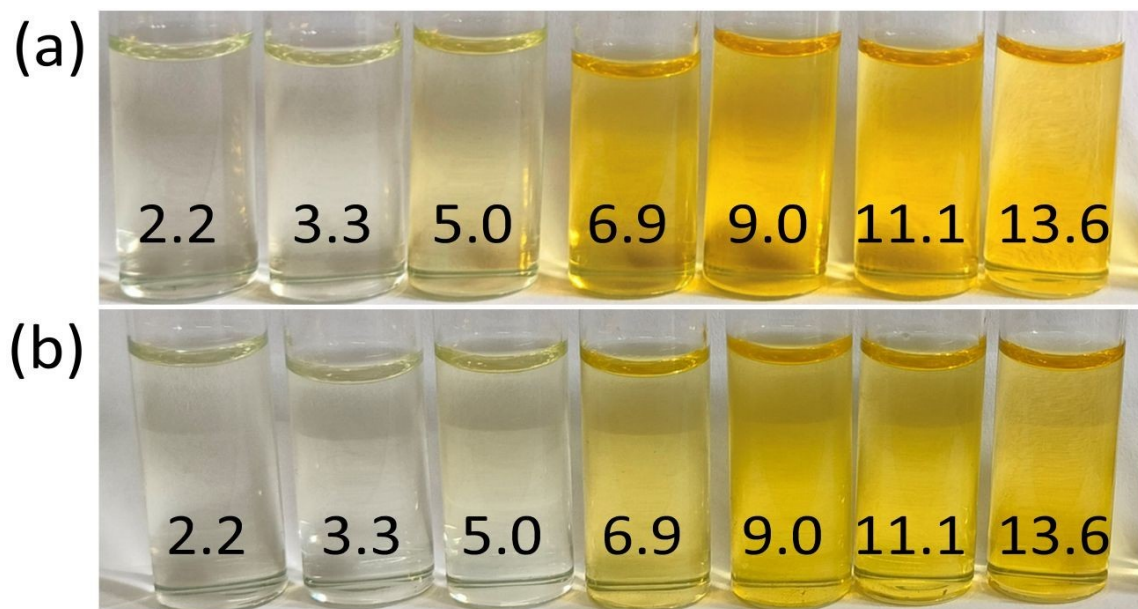

**Figure S5.** Change in color of solutions of **1** (a) and **2** (b) at different pH values in DMF: H<sub>2</sub>O (2:1, v/v).

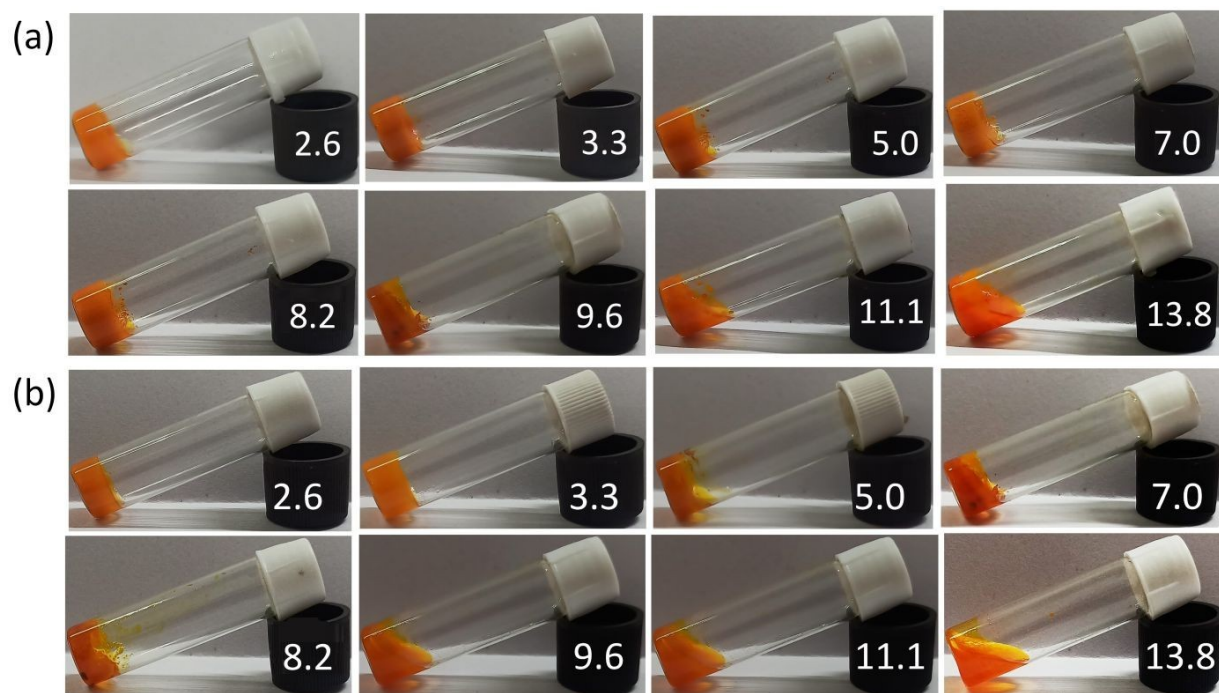

**Figure S6.** pH variation in DMF-H<sub>2</sub>O (2: 1, v/v) gels of **1**(a) and **2** (b).

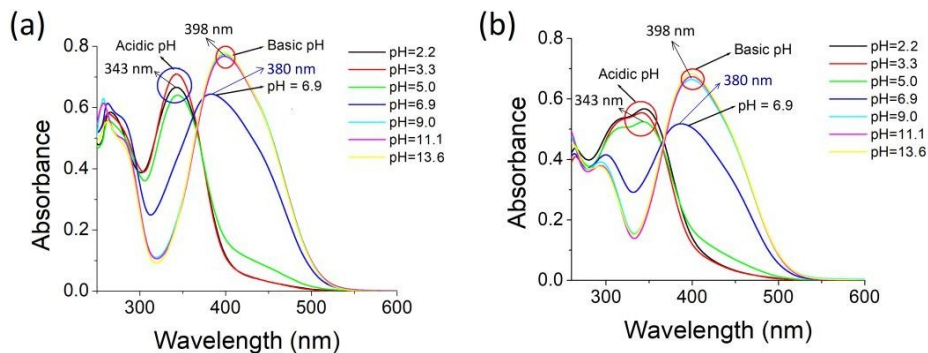

**Figure S7.** Change in absorbances of **1** (a) and **2** (b) ( $c = 2.50 \times 10^{-5}$  M) in DMF-H<sub>2</sub>O (2:1, v/v) at different pH values.

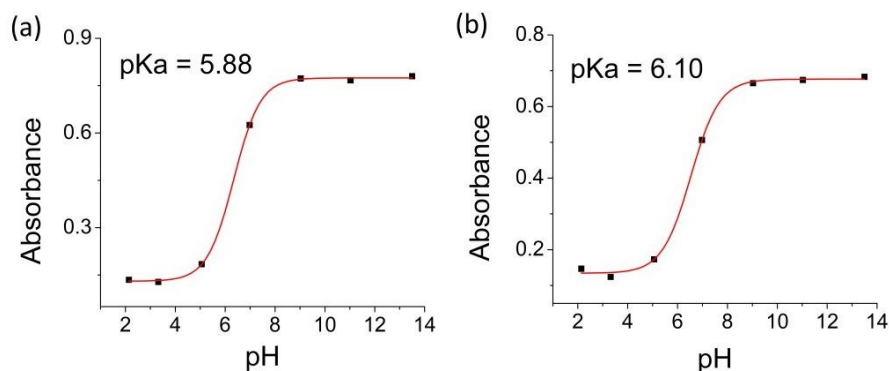

**Figure S8.** Change in absorbances of **1** and **2** at 380 nm 385 nm, respectively in response to pH change in DMF: H<sub>2</sub>O (2: 1, v/v) to determine pKa values.

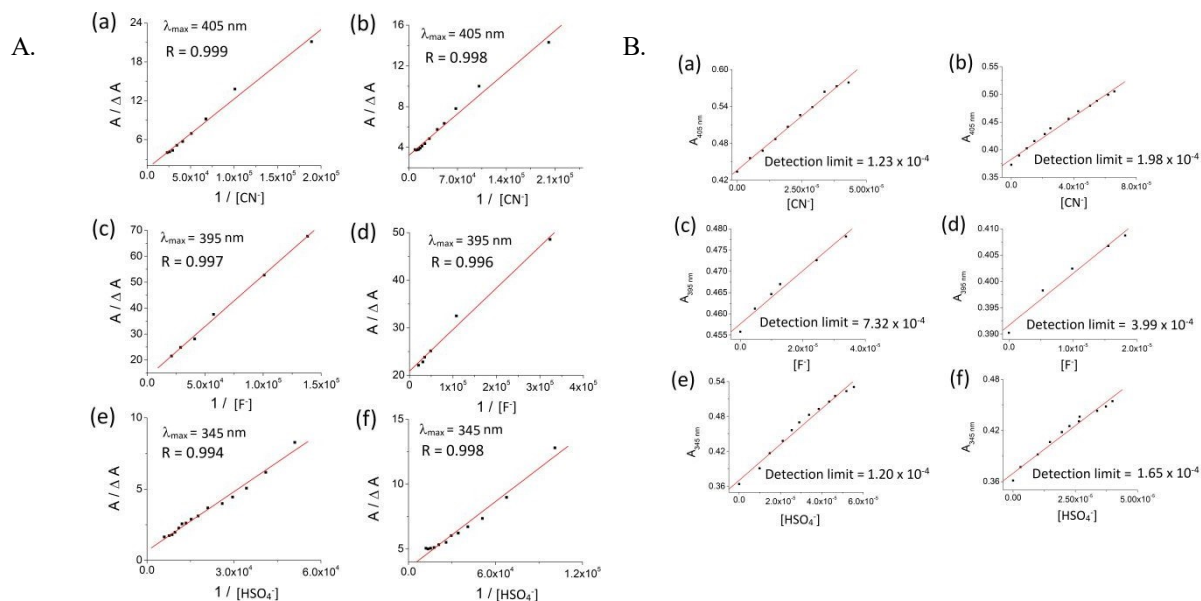

**Figure S9.** Benesi-Hildebrand plots of A. compound **1** (a, c, e) and compound **2** (b, d, f) using UV-vis titration data; B. Detection limits for the anions (CN<sup>-</sup>, F<sup>-</sup> and HSO<sub>4</sub><sup>-</sup>;  $c = 1.0 \times 10^{-3}$  M) with **1** (a, c and e) and **2** (b, d and f) ( $c = 2.5.0 \times 10^{-5}$  M) from UV-vis in DMF-H<sub>2</sub>O (2: 1, v/v).



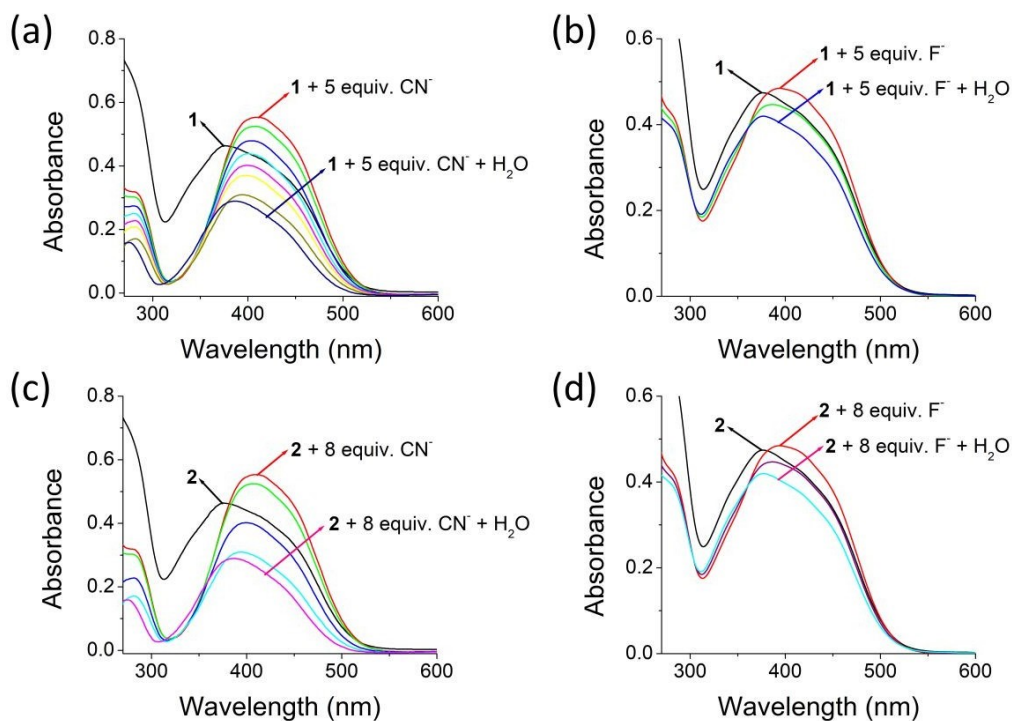

**Figure S10.** Change in absorbance of (a) **1**.CN<sup>-</sup>ensemble (b) **1**.F<sup>-</sup> ensemble and (c) **2**.CN<sup>-</sup>ensemble (d) **2**. F<sup>-</sup>ensemble [prepared from addition of 5 equiv. amounts of CN<sup>-</sup> and F<sup>-</sup> ( $c = 1.0 \times 10^{-3}$  M) to **1** ( $c = 2.50 \times 10^{-5}$  M) and 8 equiv. amounts of CN<sup>-</sup> and F<sup>-</sup> ( $c = 1.0 \times 10^{-3}$  M) to **2** ( $c = 2.50 \times 10^{-5}$  M), respectively in DMF-H<sub>2</sub>O (2: 1, v/v)] upon addition of H<sub>2</sub>O.

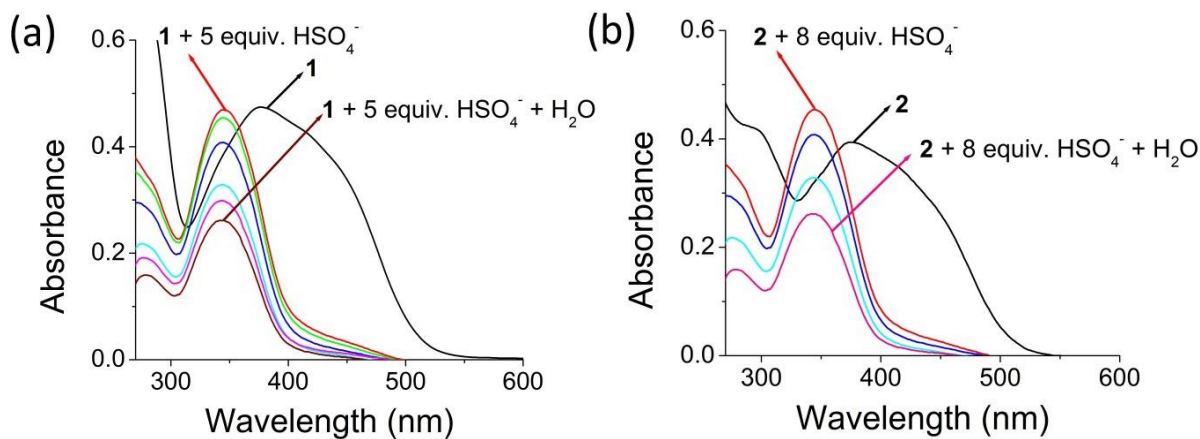

**Figure S11.** Change in absorbances of the ensembles of HSO<sub>4</sub><sup>-</sup> with **1** and **2** [prepared from addition of 5 equiv. amounts of HSO<sub>4</sub><sup>-</sup> ( $c = 1.0 \times 10^{-3}$  M) to **1** ( $c = 2.50 \times 10^{-5}$  M) and 8 equiv. amounts of HSO<sub>4</sub><sup>-</sup> ( $c = 1.0 \times 10^{-3}$  M) to **2** ( $c = 2.50 \times 10^{-5}$  M) in DMF-H<sub>2</sub>O (2: 1, v/v)] upon addition of H<sub>2</sub>O.

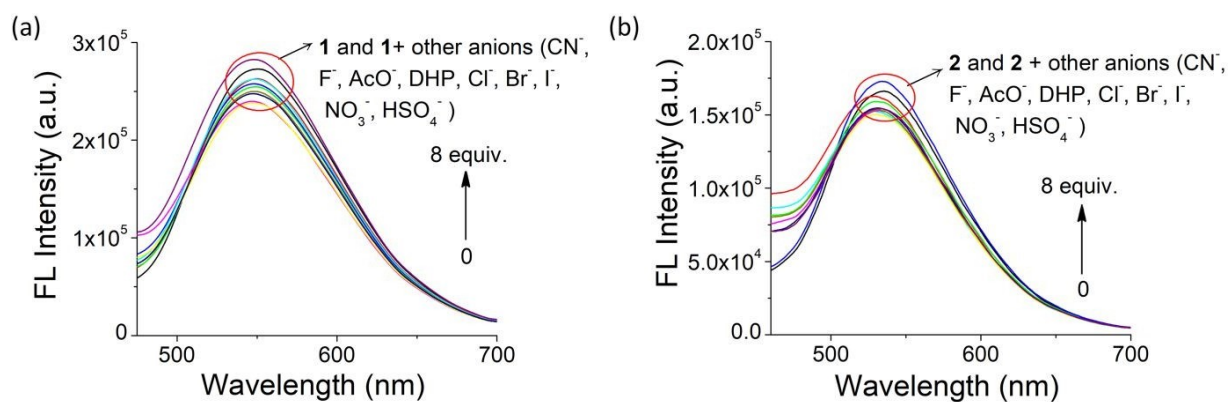

**Figure S12.** Change in emissions ( $\lambda_{\text{exc}} = 380$  nm) of **1** (a) and **2** (b) ( $c = 2.50 \times 10^{-5}$  M) in DMF-H<sub>2</sub>O (2:1, v/v) upon addition of tetrabutylammonium salts of other anions.

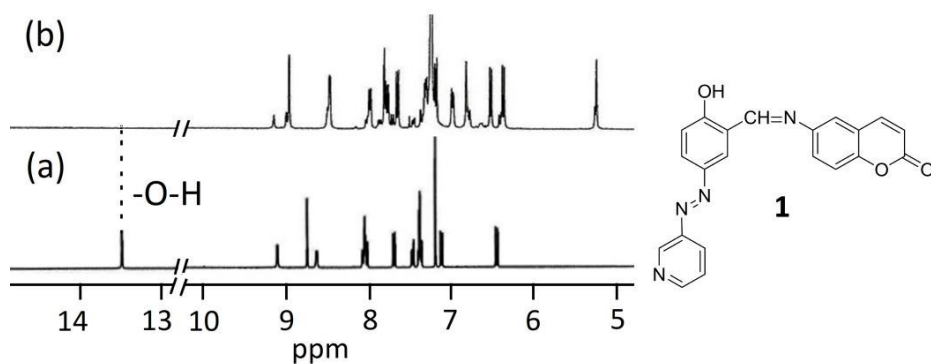

**Figure S13.** Partial <sup>1</sup>H NMR (400 MHz) of **1** ( $c = 1.08 \times 10^{-2}$  M) in the absence (a) and presence (b) of 1 equiv. amount of CN<sup>-</sup> ( $c = 0.223$  M) in CDCl<sub>3</sub>.

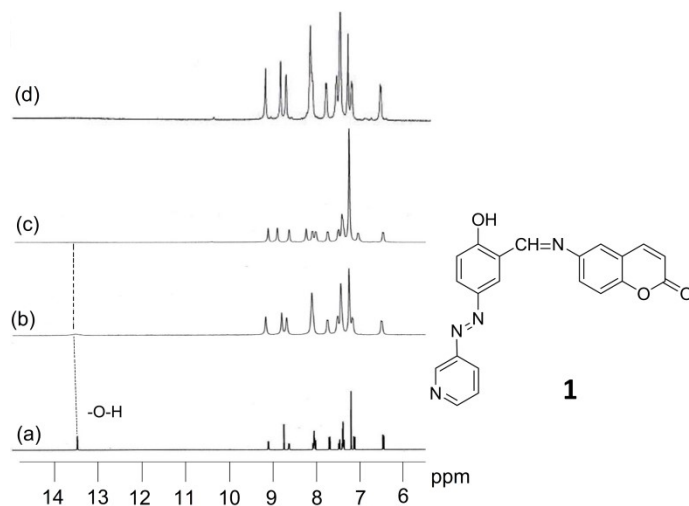

**Figure S14.** Partial <sup>1</sup>H NMR (400 MHz) of **1** ( $c = 1.08 \times 10^{-2}$  M) in the absence (a) and presence (b) of 0.20 equiv., (c) 0.50 equiv. and (d) 1 equiv. amount of F<sup>-</sup> ( $c = 0.380$  M) in CDCl<sub>3</sub>.

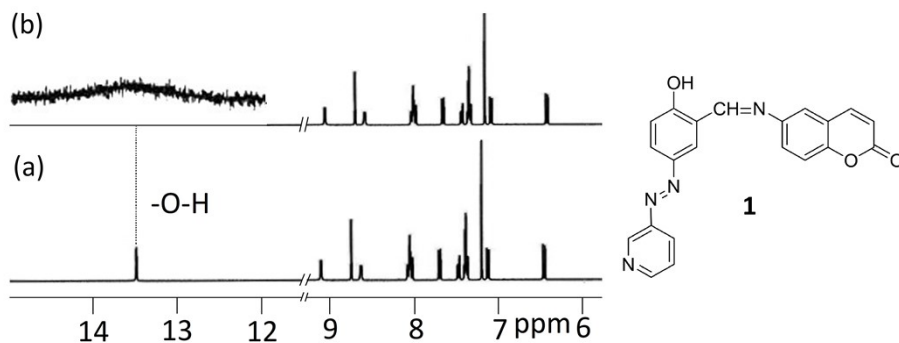

**Figure S15.** Partial  $^1\text{H}$  NMR (400 MHz) of **1** ( $c = 1.08 \times 10^{-2}$  M) (a) in the absence and (b) presence of 1 equiv. amount of  $\text{HSO}_4^-$  ( $c = 0.353$  M) in  $\text{CDCl}_3$ .

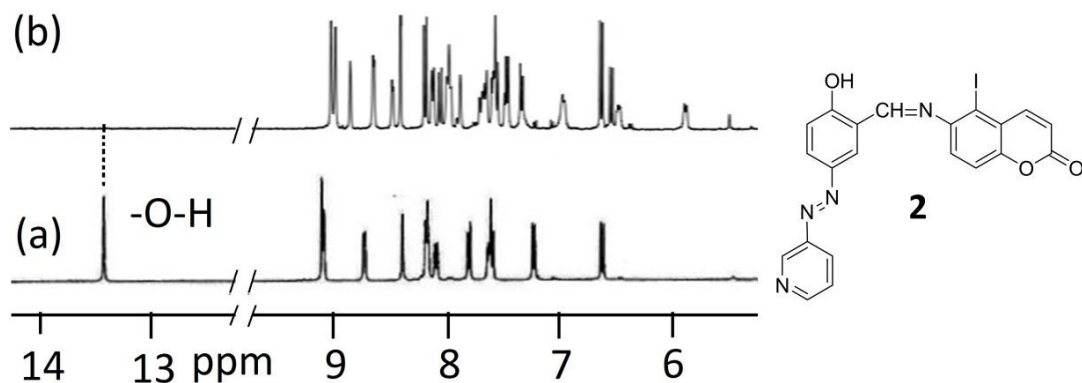

**Figure S16.** Partial  $^1\text{H}$  NMR (400 MHz) of **2** ( $c = 6.0 \times 10^{-3}$  M) in the absence (a) and presence (b) of 1 equiv. amount of  $\text{CN}^-$  ( $c = 0.223$  M) in  $\text{DMSO-d}_6$ .

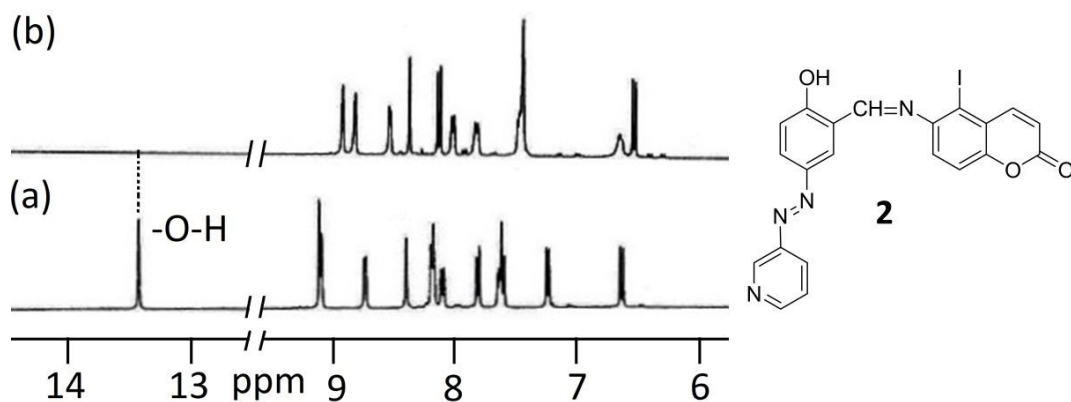

**Figure S17.** Partial  $^1\text{H}$  NMR (400 MHz) of **2** ( $c = 6.0 \times 10^{-3}$  M) in the absence (a) and presence (b) of 1 equiv. amount of  $\text{F}^-$  ( $c = 0.380$  M) in  $\text{DMSO-d}_6$ .



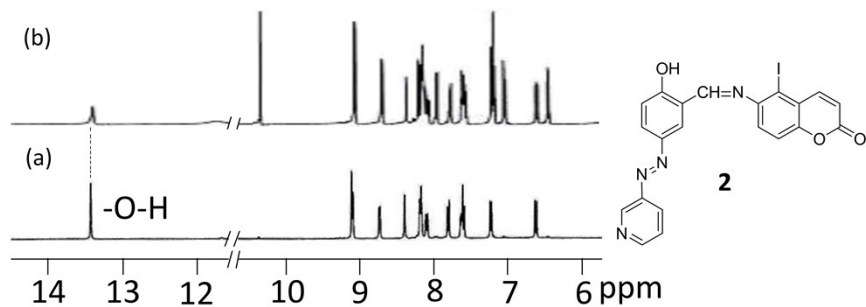

**Figure S18.** Partial  $^1\text{H}$  NMR (400 MHz) of **2** ( $c = 6.0 \times 10^{-3}$  M) in the absence (a) and presence (b) of 1equiv. amount of  $\text{HSO}_4^-$  ( $c = 0.353$  M) in  $\text{DMSO-d}_6$ .

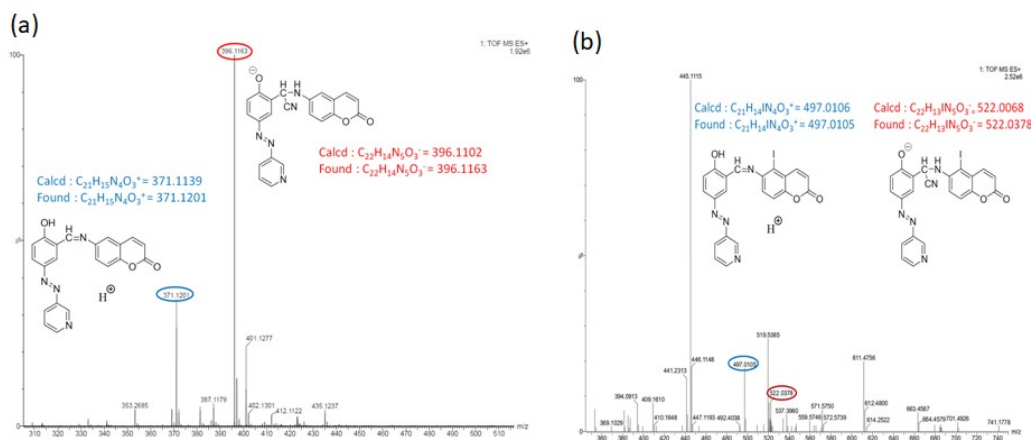

**Figure S19.** Mass spectra of the cyanide adducts of (a) **1** and (b) **2**.

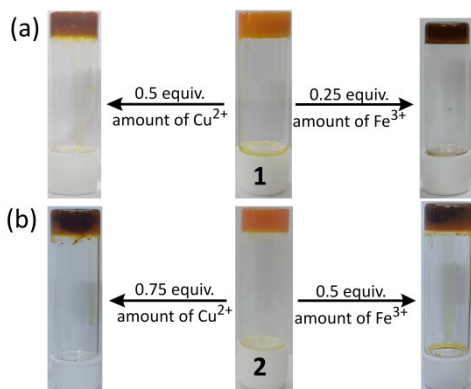

**Figure S20.** Gel-to-gel color change for DMF- $\text{H}_2\text{O}$  (2: 1, v/v) gels of **1** (5 mg/mL) and **2** (6 mg/mL) upon addition of minimum amount of  $\text{Cu}(\text{ClO}_4)_2$  and  $\text{Fe}(\text{ClO}_4)_3$ .

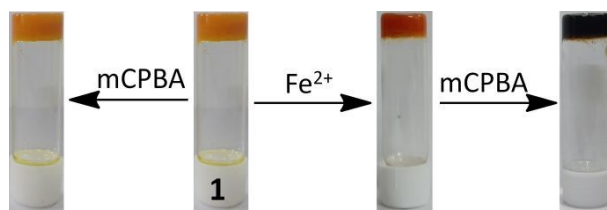

**Figure S21.** Treatment of *m*-CPBA in Fe<sup>2+</sup>- induced gel of **1** in DMF-H<sub>2</sub>O (2:1, v/v).

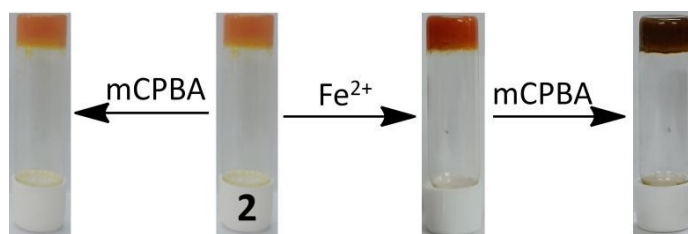

**Figure S22.** Treatment of *m*-CPBA in Fe<sup>2+</sup>- induced gel of **2** in DMF-H<sub>2</sub>O (2:1, v/v).

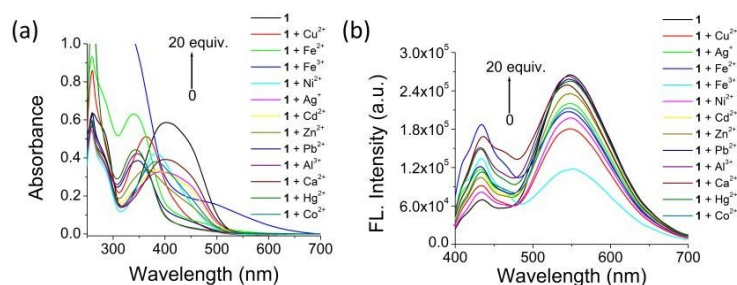

**Figure S23.** Change in absorbance (a) and emission ( $\lambda_{\text{exc}} = 380 \text{ nm}$ ) (b) of **1** ( $c = 2.5 \times 10^{-5} \text{ M}$ ) upon addition of 20 equiv. amounts of different metal ions ( $c = 1 \times 10^{-3} \text{ M}$ ) in DMF-H<sub>2</sub>O (2:1, v/v).

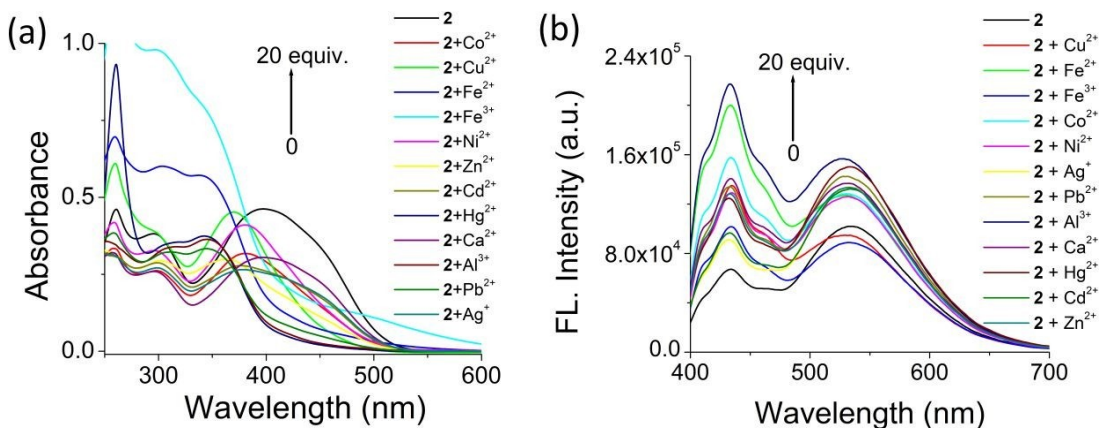

**Figure S24.** Change in absorbance (a) and emission ( $\lambda_{\text{exc}} = 380 \text{ nm}$ ) (b) of **2** ( $c = 2.5 \times 10^{-5} \text{ M}$ ) upon addition of 20 equiv. amounts of different metal ions ( $c = 1 \times 10^{-3} \text{ M}$ ) in DMF-H<sub>2</sub>O (2:1, v/v).

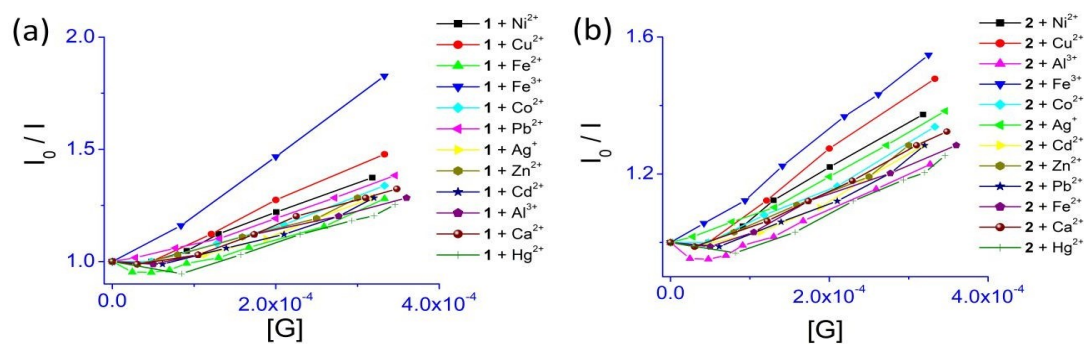

**Figure S25.** Stern-Volmer plots for compounds (a) **1** and (b) **2** with the different metal ions.

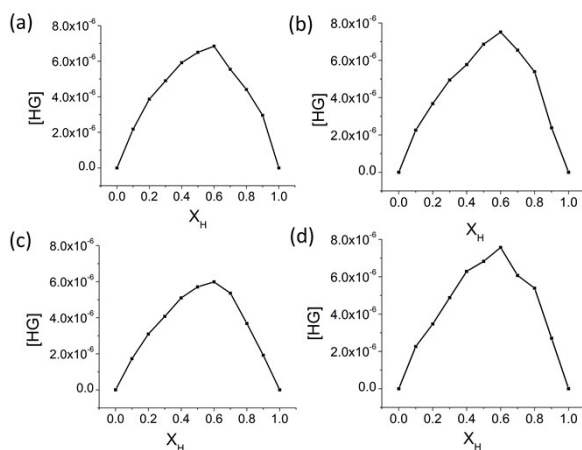

**Figure S26.** UV-vis Job plots for compound **1** with (a)  $\text{Cu}^{2+}$  and (b)  $\text{Fe}^{3+}$  ( $[\text{H}] = [\text{G}] = \text{M}$ ) compound **2** with (a)  $\text{Cu}^{2+}$  and (b)  $\text{Fe}^{3+}$  in DMF- $\text{H}_2\text{O}$  (2:1, v/v) where  $[\text{H}] = [\text{G}] = 2.5 \times 10^{-5} \text{ M}$ .

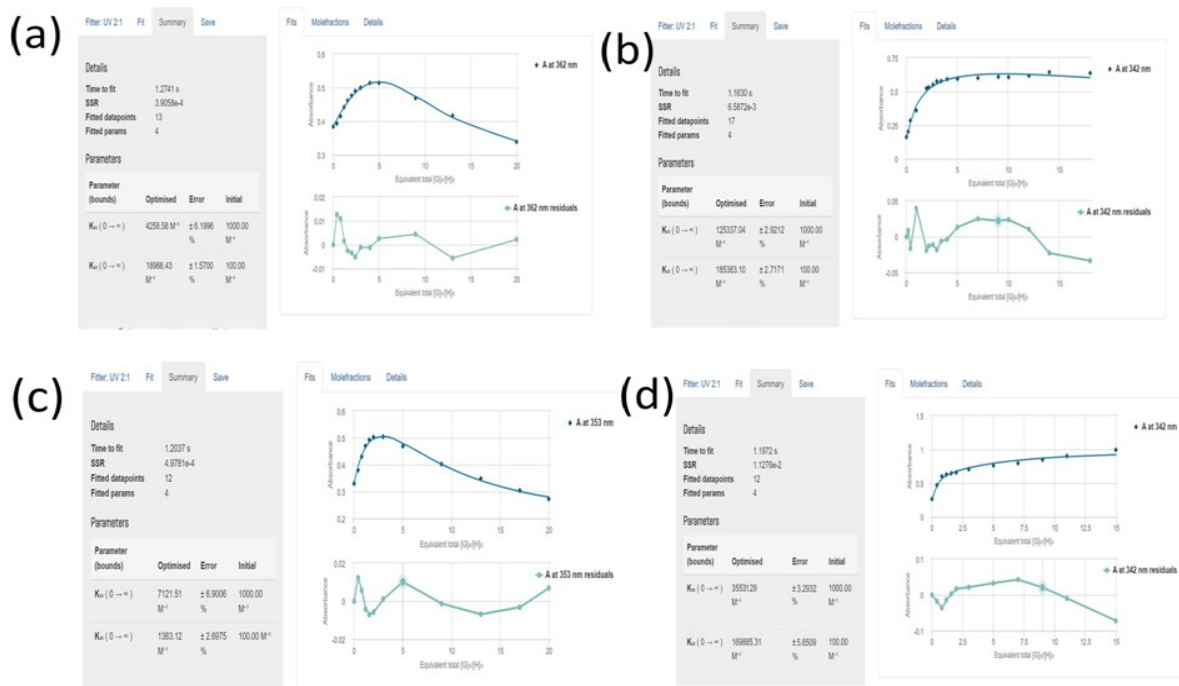

**Figure S27.** Non-linear fitting of UV-vis titration data for binding constant determination: (a) **1** with  $\text{Cu}^{2+}$  ions, (b) **1** with  $\text{Fe}^{3+}$  ions, (c) **2** with  $\text{Cu}^{2+}$  ions, (d) **2** with  $\text{Fe}^{3+}$  ions.

**Table S3.** Crystallographic data and structure refinement of Cu<sup>2+</sup>-complex of **2**.

|                                            |                                                                                |
|--------------------------------------------|--------------------------------------------------------------------------------|
| Empirical formula                          | C <sub>42</sub> H <sub>24</sub> Cu <sub>12</sub> N <sub>8</sub> O <sub>6</sub> |
| Formula weight                             | 1054.03 g/mol                                                                  |
| Temperature/K                              | 298(2) K                                                                       |
| Crystal system                             | triclinic                                                                      |
| Space group                                | P-1                                                                            |
| a/Å                                        | 8.4881(17)                                                                     |
| b/Å                                        | 9.0750(18)                                                                     |
| c/Å                                        | 14.960(3)                                                                      |
| $\alpha$ /°                                | 93.295(6)                                                                      |
| $\beta$ /°                                 | 105.306(6)                                                                     |
| $\gamma$ /°                                | 92.251(6)                                                                      |
| Volume/Å <sup>3</sup>                      | 1107.9(4)                                                                      |
| Z                                          | 1                                                                              |
| $\rho_{\text{calc}}/\text{cm}^3$           | 1.580                                                                          |
| $\mu/\text{mm}^{-1}$                       | 1.940                                                                          |
| F(000)                                     | 515                                                                            |
| Crystal size/mm <sup>3</sup>               | 0.056 × 0.089 × 0.152                                                          |
| Radiation                                  | MoK $\alpha$ ( $\lambda$ = 0.71073)                                            |
| 2 $\theta$ range for data collection/°     | 4.50° to 50.50°                                                                |
| Index ranges                               | -10 ≤ h ≤ 10, -10 ≤ k ≤ 10, -17 ≤ l ≤ 17                                       |
| Reflections collected                      | 20628                                                                          |
| Independent reflections                    | 3938 [R(int) = 0.1270]                                                         |
| Data/ restraints/ parameters               | 3938 / 0 / 268                                                                 |
| Goodness-of-fit on F <sup>2</sup>          | 1.062                                                                          |
| Final R indexes [I > 2 $\sigma$ (I)]       | R1 = 0.1089, wR2 = 0.1656                                                      |
| Final R indexes [all data]                 | R1 = 0.1975, wR2 = 0.1986                                                      |
| Largest diff. peak/hole /e Å <sup>-3</sup> | 1.374/ -0.671                                                                  |
| CCDC Number                                | 2361386                                                                        |

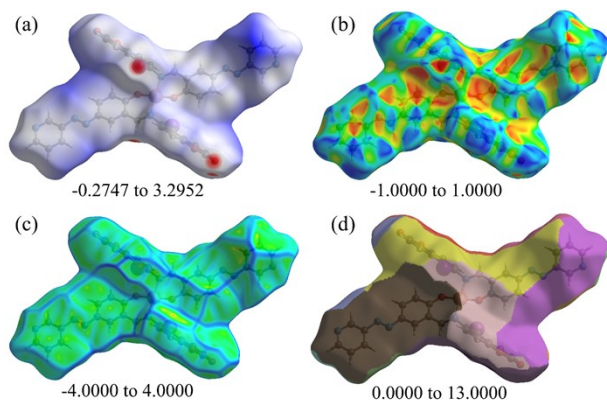

**Figure S28.** Hirshfeld surfaces of the complex (a)  $d_{\text{norm}}$ , (b) shape index, (c) curvedness, and (d) fragment patch.

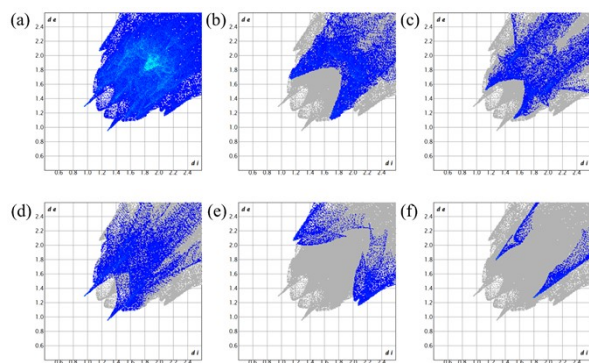

**Figure S29.** 2D fingerprint plots of the complex (a) all interactions, (b)  $\text{C}\cdots\text{H}/\text{H}\cdots\text{C}$  interactions, (c)  $\text{N}\cdots\text{H}/\text{H}\cdots\text{N}$  interactions, (d)  $\text{O}\cdots\text{H}/\text{H}\cdots\text{O}$  interactions, (e)  $\text{I}\cdots\text{H}/\text{H}\cdots\text{I}$  interactions, and (f)  $\text{I}\cdots\text{O}/\text{O}\cdots\text{I}$  interactions.

# $^1\text{H}$ NMR ( $\text{CDCl}_3$ , 400 MHz) of 1

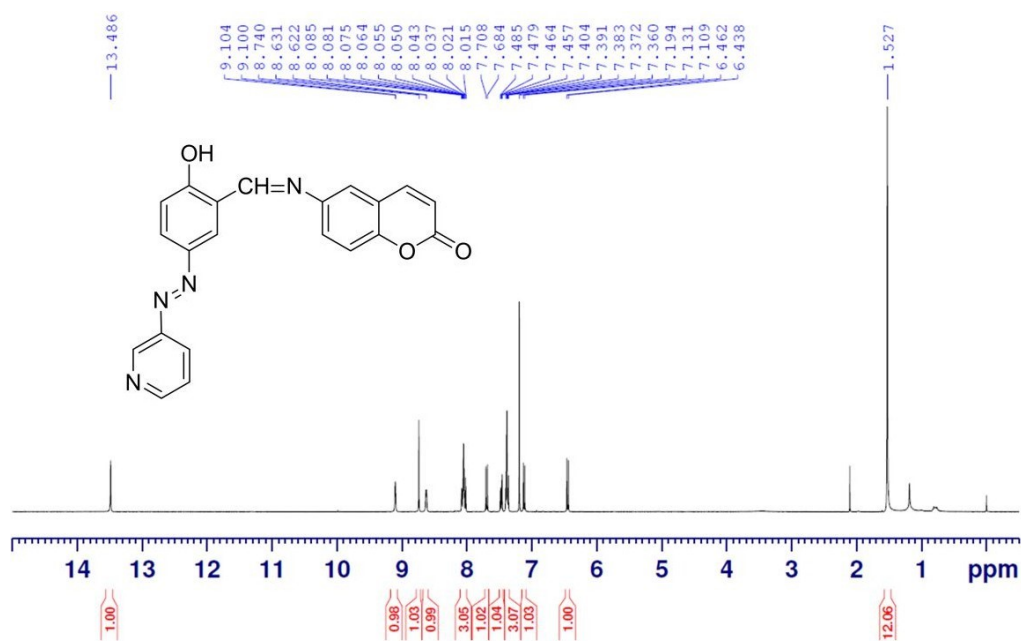

# $^{13}\text{C}$ NMR ( $\text{CDCl}_3$ , 100 MHz) of 1

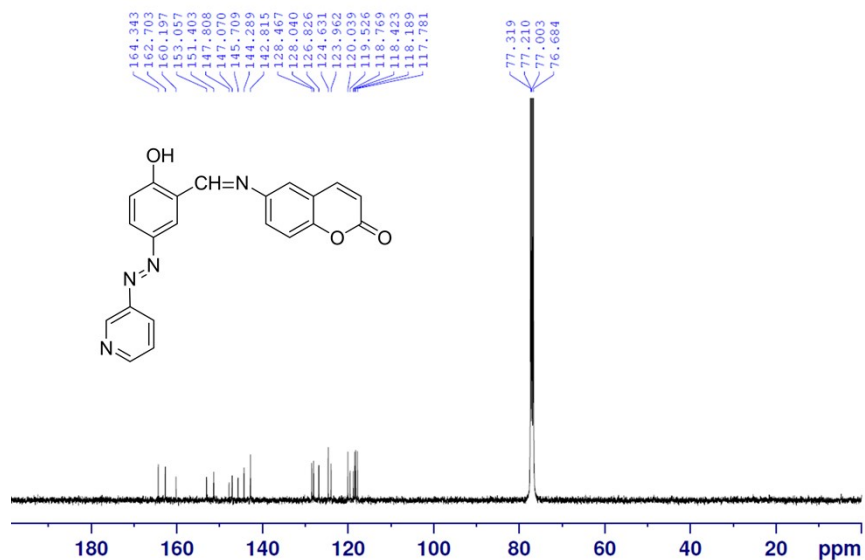



# <sup>1</sup>H NMR (DMSO-d<sub>6</sub>, 400 MHz) of 2

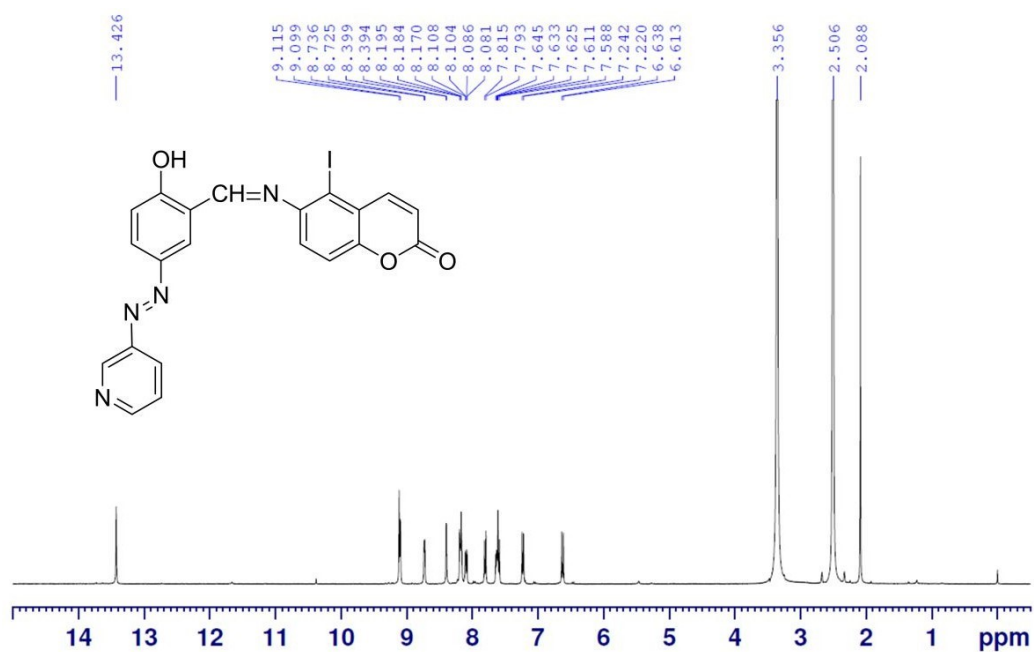

# <sup>13</sup>C NMR (DMSO-d<sub>6</sub>, 100 MHz) of 2

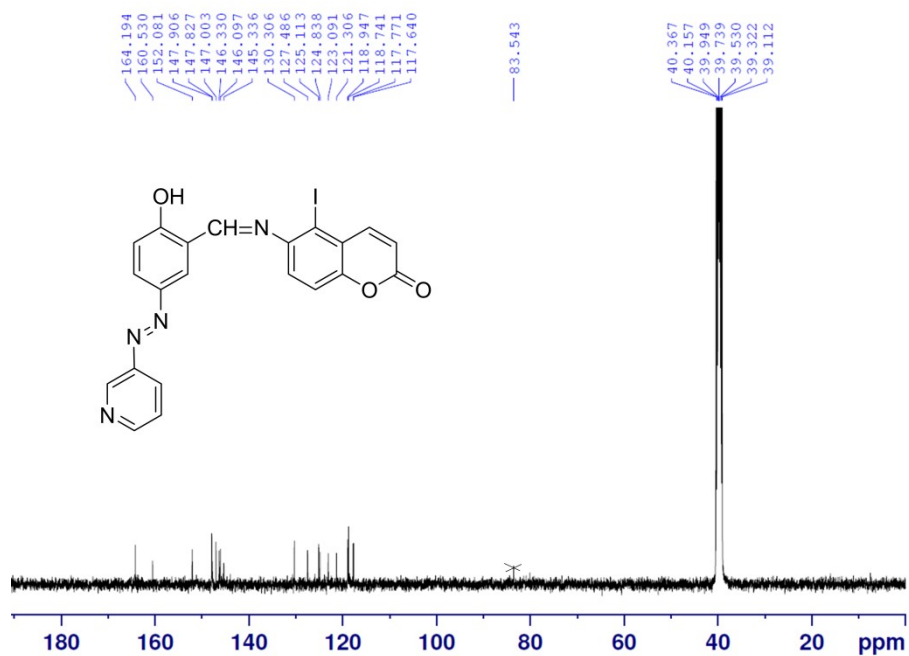

## Mass spectrum of 1

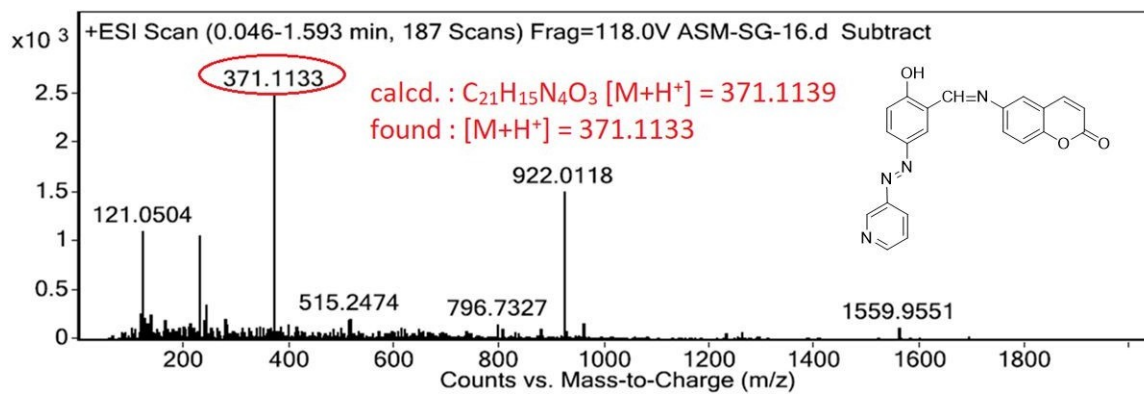

## Mass spectrum of 2

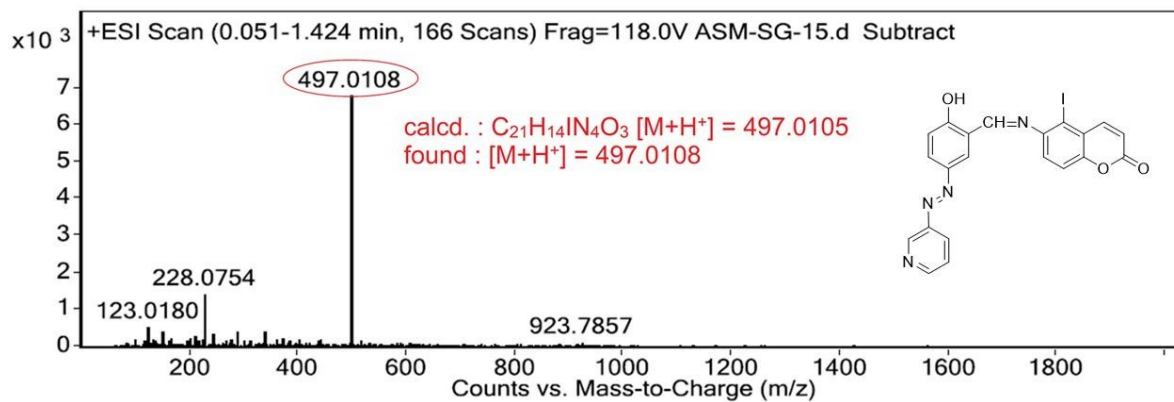

Supplement: d4ra05503a1.pdf [file d4ra05503a1.pdf]
